# Supplementary material for: Unveiling the mechanism of tuning elemental distribution in high entropy alloys and its effect on thermal stability
Source: Royal Society of Chemistry journal article supplement (doi:10.1039/d4na00202d), 2024-01-01
Supplement: d4na00202d1.pdf [file d4na00202d1.pdf]

## Supplemental Information for:

# Unveiling mechanism of tuning elemental distribution in high entropy alloys and its effect on thermal stability

*Panhua Shi<sup>a</sup>, Yiyang Yang<sup>a</sup>, Baodian Yao<sup>b</sup>, Jiaxuan Si<sup>a,c</sup>, Yuexia Wang<sup>a\*</sup>*

*a. Key Laboratory of Nuclear Physics and Ion-beam Application (MOE), Institute of Modern Physics, Fudan University, Shanghai 200433, China*

*b. Shandong Peninsula Engineering Research Center of Comprehensive Brine Utilization, Weifang University of Science and Technology, Shouguang 262700, Shandong, China*

*c. The Fourth Sub-Institute, Nuclear Power Institute of China, Chengdu, 610005, China*

---

\* Corresponding Author at: Key Laboratory of Nuclear Physics and Ion-beam Application (MOE), Institute of Modern Physics, Fudan University, Shanghai 200433, China  
*E-mail address: yxwang@fudan.edu.cn*

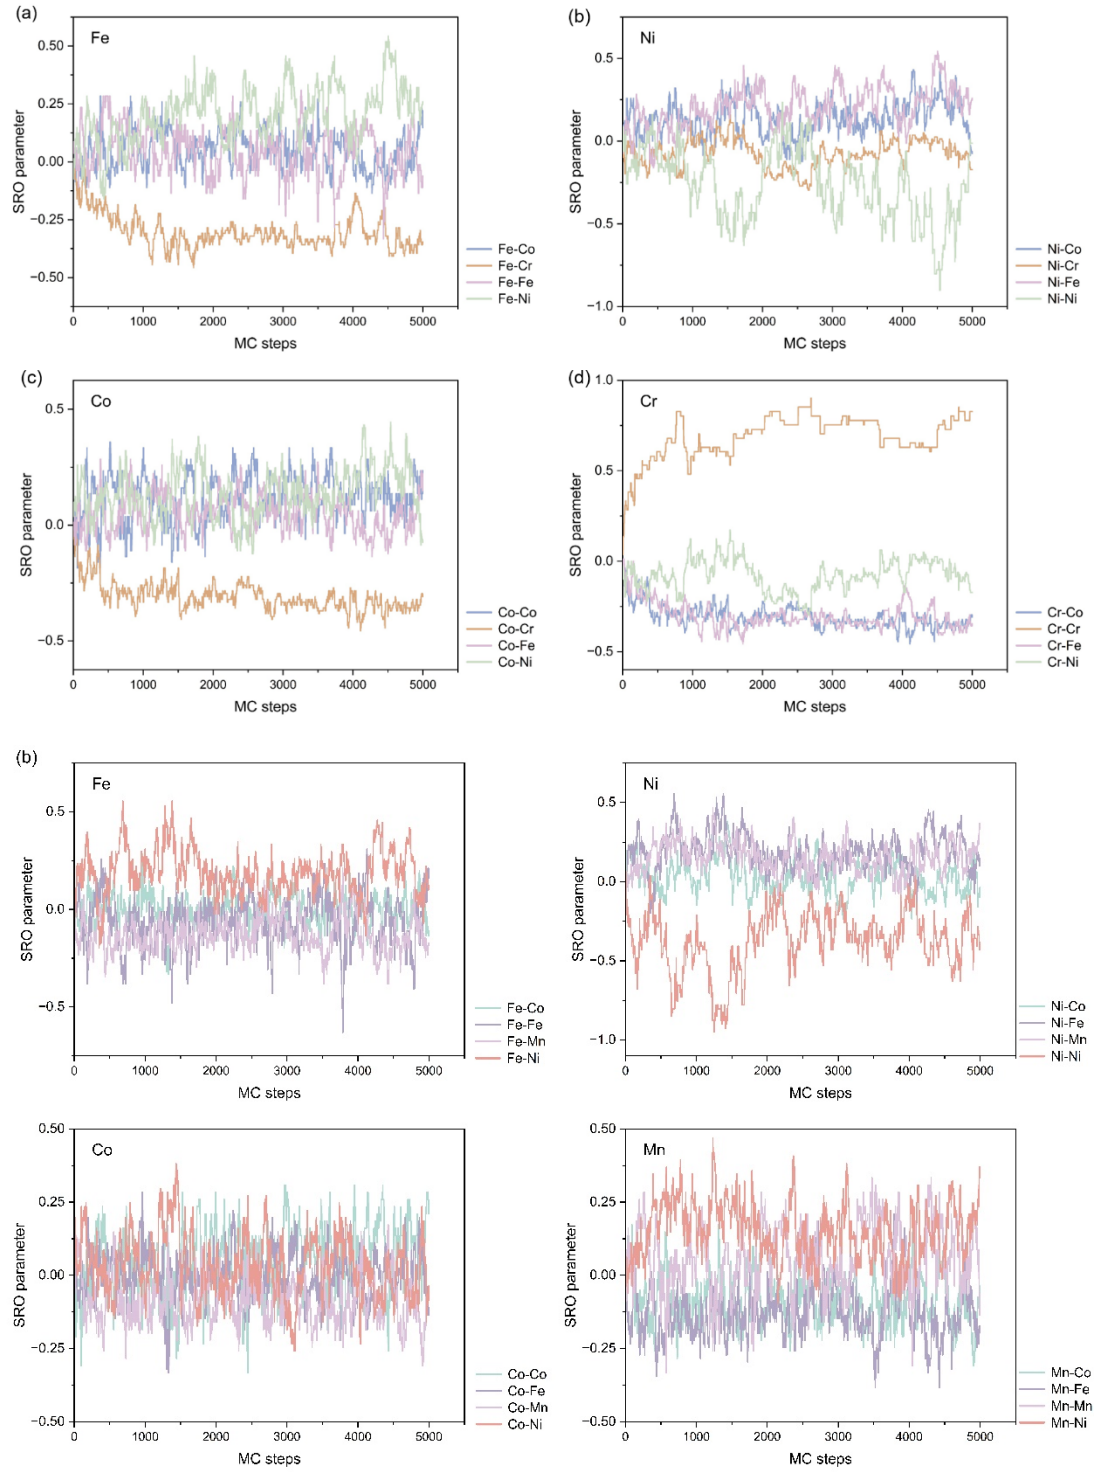

Fig. S1 1NN chemical SRO parameter of CoFeNiCr and CoFeNiMn HEA. (a) CoFeNiCr HEA; (b) CoFeNiMn HEA.

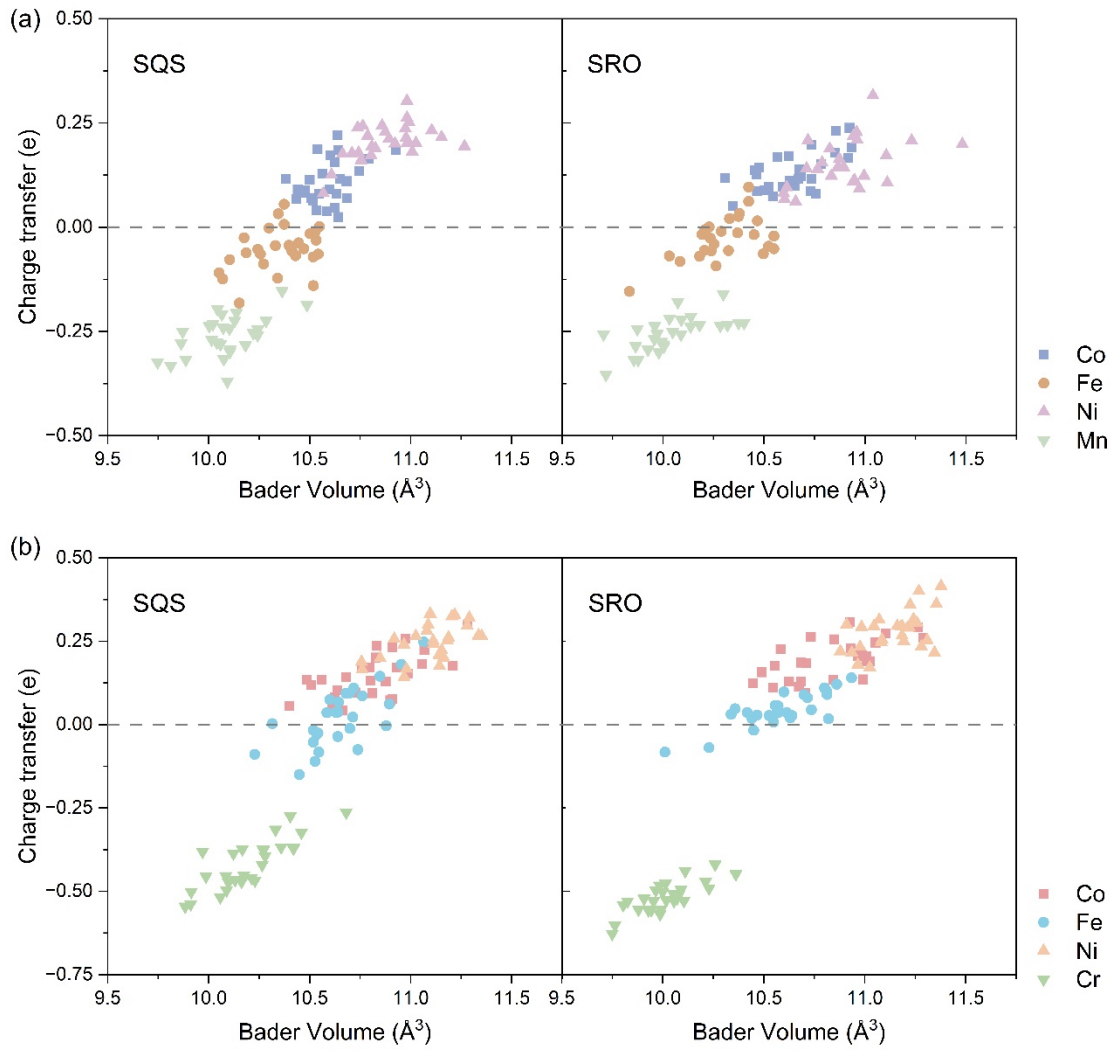

Fig. S2 Correlation between Charge transfer and Bader Volume. (a) CoFeNiMn; (b) CoFeNiCr.

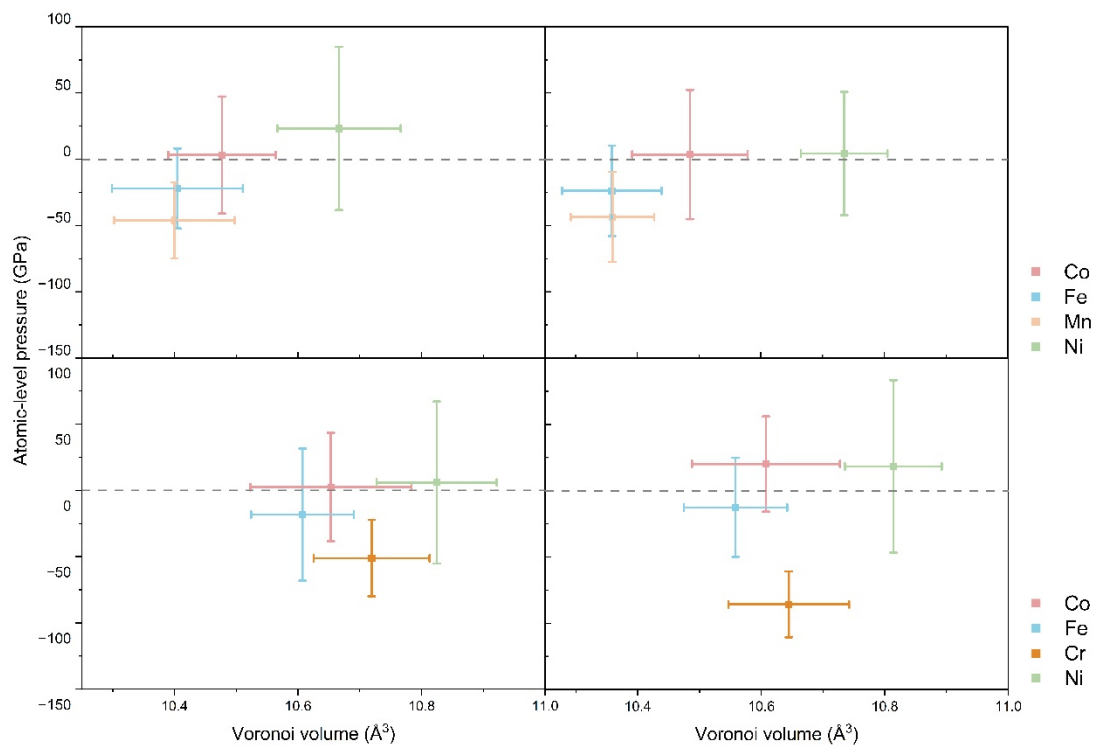

Fig. S3 Correlation between Ave. charge transfer and Ave. Bader Volume. (a) CoFeNiMn; (b) CoFeNiCr.

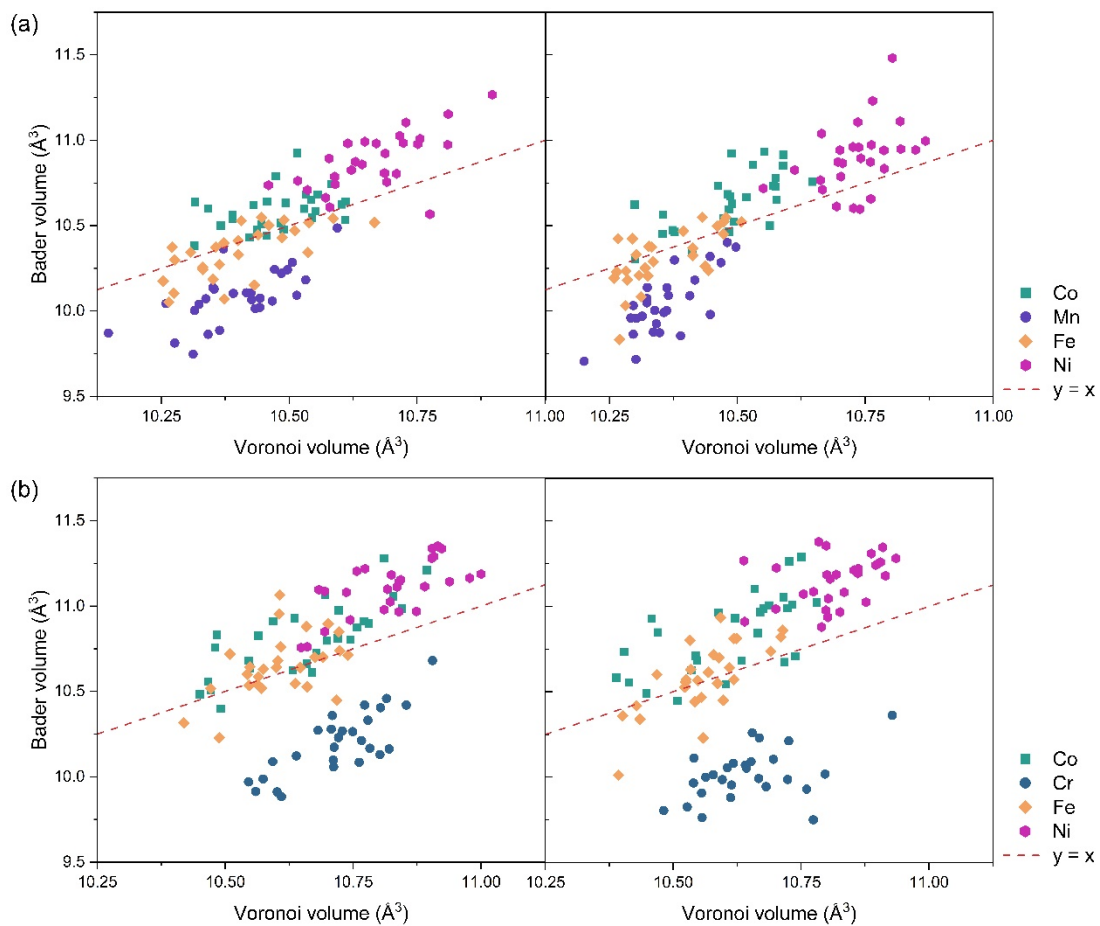

Fig. S4 Correlation between Voronoi volume and Bader Volume. (a) CoFeNiMn; (b) CoFeNiCr. Left corresponds to SQS structures, and right corresponds to SRO structures. The red dashed line represents the asymptote  $y = x$ .

## Strain-Stress calculations

Elastic constants are crucial physical properties that characterize a material's ability to deform under small stresses. These constants can be determined by describing a physical quantity as a fourth-order tensor  $C_{ijkl}$ . This tensor establishes the relationship between the second-order stress tensor  $\sigma_{ij}$  and the second-order strain tensor  $e_{kl}$ , following the generalized Hooke's Law:

$$\sigma_{ij} = C_{ijkl}e_{kl}$$

The above formula can be simplified using the Voigt-Reuss-Hill (VRH) averaging method<sup>1</sup>. In the calculations for Voigt and Reuss averages, the Poisson's ratio is neglected. This is because Voigt average assumes uniform strain in each phase, while Reuss average assumes uniform stress in each phase. This simplification is represented by a square  $6 \times 6$  matrix  $C_{mn}$  to denote the fourth-order tensor  $C_{ijkl}$ , and the simplified formula becomes

$$\sigma_i = C_{ij}e_j$$

The lattice vectors  $a_{ij}'$  of a crystal affected by strain can be obtained through the relationship between the original lattice vectors  $a_{ij}^0$  and the strain tensor  $e_{ij}$ . We relax the system in the x and y directions while subjecting 1% change in the z direction.

## Reference

1. R. Hill, *Proc. Phys. Soc. London, Sect. A*, 1952, **65**, 349.
